# Supplementary material for: Dietary Bovine Lactoferrin Reduces Staphylococcus aureus in the Tissues and Modulates the Immune Response in Piglets Systemically Infected with S. aureus
Source: PubMed Central journal article supplement — Curr Dev Nutr. 2017 Dec 26;2(4):nzy001. doi: 10.1093/cdn/nzy001 (PMC6041752; doi:10.1093/cdn/nzy001), 2017-12-26
Supplement: nzy001_supp.pdf [file nzy001_supp.pdf]

**SUPPLEMENTAL DATA FOR PUBLICATION**

**Supplemental Table 1.** Cocktails of Antibodies used to Detect Immune Cells by Flow Cytometry

| <b>Target Cell Populations</b> | <b>Antibodies in Cocktail (Clone)</b>                                                                     |
|--------------------------------|-----------------------------------------------------------------------------------------------------------|
| T cells/Natural Killer Cells   | Anti-CD3 (PPT3) <sup>a</sup><br>Anti-CD4 (74-12-4) <sup>a</sup><br>Anti-CD8 (76-2-11) <sup>a</sup>        |
| Monocytes/Macrophages          | Anti-CD172a (74-22-15) <sup>a</sup><br>Anti-CD163 (2A10/11) <sup>b</sup><br>Anti-CD14 (MIL2) <sup>b</sup> |
| B cells                        | Anti-CD21 (BB6-11C9.6) <sup>a</sup><br>Anti-SLA class II DR (2E9/13) <sup>b</sup>                         |

<sup>a</sup>Southern Biotech (Birmingham, AL, USA)

<sup>b</sup>AbD Serotec, a Bio-Rad Company (Raleigh, NC, USA).

**Supplemental Table 2.** *B. infantis* in ascending colon contents and feces at 120h after *S. aureus* infection in piglets fed control formula (CON), control formula with *B. infantis* administration (BI,  $3 \times 10^9$  CFU/d) or formula with 4 g/L bLf alone (LF) or with *B. infantis* administration (COMB).

|      | Occurrence                         |              | Abundance                  |            |
|------|------------------------------------|--------------|----------------------------|------------|
|      | # positive/total # of animals, (%) |              | Log <sub>10</sub> copies/g |            |
|      | AC                                 | Feces        | AC                         | Feces      |
| CON  | 0/12, (0)                          | 1/9, (11)    | BLD                        | BLD        |
| LF   | 1/12, (8)                          | 0/11, (0)    | BLD                        | BLD        |
| BI   | 9/10, (90)*                        | 8/8, (100) * | 7.0 ± 1.1*                 | 7.2 ± 1.1* |
| COMB | 12/13, (92) *                      | 9/9, (100) * | 7.5 ± 1.4*                 | 7.4 ± 1.0* |

Abbreviations: AC, ascending colon; *B. infantis*, *Bifidobacterium longum* subsp. *infantis* ATCC 15697; BLD, below level of detection; CON, control; BI, *B. infantis*; LF, bovine lactoferrin; COMB, both *B. infantis* and bovine lactoferrin; *S. aureus*, *Staphylococcus aureus* strain S54F9

Data are expressed as Mean ± SD

\*Means in a column without a common superscript differ by treatment,  $P < 0.0001$

**Supplemental Table 3.** Whole blood cell populations and percentages determined by CBC/differential analysis in 7-day-old piglets (pre-infection) or 12-day-old piglets (5 days post-infection with *S. aureus*) fed formula with 4 g/l whey (CON), control formula with *B. infantis* administration (BI,  $10^9$  CFU/d) or formula with 4 g/l bLf alone (LF) or with *B. infantis* administration (COMB).

|                                 | CON                 | LF                  | BI                  | COMB                |
|---------------------------------|---------------------|---------------------|---------------------|---------------------|
| Hemoglobin, g/dL                |                     |                     |                     |                     |
| Pre-Infection                   | 7.5 ± 0.7           | 8.2 ± 0.4           | 7.5 ± 0.5           | 7.7 ± 0.4           |
| Post-Infection                  | 6.6 ± 0.3           | 6.3 ± 0.2           | 6.2 ± 0.3           | 6.5 ± 0.2           |
| NRBC, per 200 WBC               |                     |                     |                     |                     |
| Pre-Infection                   | 2.0 ± 0.9           | 2.5 ± 1.1           | 3.2 ± 0.9           | 3.0 ± 1.1           |
| Post-Infection                  | 5.4 ± 2.1           | 3.9 ± 1.5*          | 9.2 ± 2.6           | 3.2 ± 1.1*          |
| WBC Count, per $\mu$ L          |                     |                     |                     |                     |
| Pre-Infection                   | 8.9 ± 2.1           | 10.9 ± 1.3          | 11.1 ± 1.0          | 9.7 ± 1.9           |
| Post-Infection                  | 10.0 ± 2.9          | 10.8 ± 2.0          | 11.4 ± 2.2          | 10.8 ± 1.6          |
| Platelets, x $10^3$ per $\mu$ L |                     |                     |                     |                     |
| Pre-Infection                   | 486 ± 65.6          | 545 ± 55.9          | 487 ± 29.4          | 456 ± 66.8          |
| Post-Infection                  | 748 ± 71.5          | 723 ± 46.9          | 681 ± 90.3          | 745 ± 46.0          |
| Seg, %                          |                     |                     |                     |                     |
| Pre-Infection                   | 66.9 ± 4.4          | 54.2 ± 5.1†         | 59.4 ± 5.0          | 51.9 ± 5.9†         |
| Post-Infection                  | 57.1 ± 5.8          | 57.3 ± 3.2          | 60.7 ± 4.7          | 60.5 ± 4.1          |
| Band, %, (n detected / total n) |                     |                     |                     |                     |
| Pre-Infection                   | 0.9 ± 0.9<br>(1/7)  | 0.6 ± 0.5<br>(2/10) | 7.0 ± 5.2<br>(5/10) | 1.1 ± 0.7<br>(3/10) |
| Post-Infection                  | 1.4 ± 0.5<br>(6/11) | 0.9 ± 0.3<br>(7/13) | 3.0 ± 1.9<br>(7/11) | 1.0 ± 0.5<br>(5/13) |
| Lymph, %                        |                     |                     |                     |                     |
| Pre-Infection                   | 30.1 ± 4.4          | 42.6 ± 5.4*         | 31.5 ± 4.1          | 43.2 ± 5.5*         |
| Post-Infection                  | 37.2 ± 6.1          | 36.4 ± 3.1          | 31.6 ± 3.1          | 34.5 ± 3.6          |

Data are expressed as Mean ± SEM

\*Means in a row without a common superscript differ by treatment,  $P < 0.05$ ; † Means in a row without a common superscript showed a trend to differ by treatment,  $0.05 \geq P < 0.10$ .

Abbreviations: Lymph, lymphocytes; Band, immature neutrophils; Seg, neutrophils; WBC, white blood cells; NRBC, nucleated red blood cells.
